# Supplementary material
Source: PubMed Central journal article supplement (PMC2151320)
Supplement: hesr0042-2442-ap1.pdf [file hesr0042-2442-ap1.pdf]

**Uninsurance Rates for Near Elderly (50-64 years), West Virginia vs. Other U.S. States, 2003**

| State                | Uninsured Rate (%) | Standard Error (%) |     |
|----------------------|--------------------|--------------------|-----|
| Alabama              | 11.3               | 1.45               | **  |
| Alaska               | 18.6               | 1.85               |     |
| Arizona              | 13.9               | 1.71               |     |
| Arkansas             | 17.6               | 2.07               |     |
| California           | 18.7               | 0.83               |     |
| Colorado             | 15.9               | 1.47               |     |
| Connecticut          | 10.8               | 1.26               | **  |
| Delaware             | 9.8                | 1.47               | **  |
| District of Columbia | 11.3               | 1.59               | *   |
| Florida              | 18.0               | 1.06               |     |
| Georgia              | 13.6               | 1.68               |     |
| Hawaii               | 10.1               | 1.25               | *** |
| Idaho                | 16.1               | 1.92               |     |
| Illinois             | 13.0               | 1.00               | *   |
| Indiana              | 15.3               | 1.50               |     |
| Iowa                 | 9.7                | 1.39               | *** |
| Kansas               | 12.1               | 1.43               | *   |
| Kentucky             | 14.8               | 1.81               |     |
| Louisiana            | 20.5               | 2.03               |     |
| Maine                | 12.2               | 1.46               | *   |
| Maryland             | 13.3               | 1.43               |     |
| Massachusetts        | 8.9                | 1.16               | *** |
| Michigan             | 8.1                | 0.94               | *** |
| Minnesota            | 5.2                | 0.93               | *** |
| Mississippi          | 15.5               | 1.97               |     |
| Missouri             | 10.3               | 1.42               | **  |
| Montana              | 14.8               | 1.79               |     |
| Nebraska             | 12.2               | 1.51               | *   |
| Nevada               | 14.8               | 1.45               |     |
| New Hampshire        | 11.0               | 1.35               | **  |
| New Jersey           | 13.7               | 1.18               |     |
| New Mexico           | 18.6               | 1.81               |     |
| New York             | 13.4               | 0.87               |     |
| North Carolina       | 13.9               | 1.36               |     |
| North Dakota         | 12.6               | 1.62               |     |
| Ohio                 | 11.2               | 0.99               | **  |
| Oklahoma             | 15.4               | 1.84               |     |
| Oregon               | 11.4               | 1.46               | *   |
| Pennsylvania         | 10.0               | 0.92               | *** |
| Rhode Island         | 9.1                | 1.22               | *** |
| South Carolina       | 15.9               | 1.80               |     |
| South Dakota         | 15.4               | 1.86               |     |
| Tennessee            | 10.2               | 1.55               | **  |
| Texas                | 21.5               | 1.11               | *   |
| Utah                 | 12.1               | 1.65               | *   |
| Vermont              | 7.3                | 1.17               | *** |
| Virginia             | 14.0               | 1.49               |     |
| Washington           | 14.2               | 1.50               |     |
| West Virginia        | 17.0               | 1.66               |     |
| Wisconsin            | 9.8                | 1.27               | *** |
| Wyoming              | 16.5               | 1.72               |     |

Source: Current Population Survey, 2004. All rates are based on weighted data. The complex survey design is corrected for using StataSE 9.1 software. Differences between West Virginia and other states significant at the  $p \leq 0.05$  (\*),  $p \leq 0.01$  (\*\*), or  $p \leq 0.001$  (\*\*\*) levels.
